# Supplementary material
Source: PubMed Central journal article supplement (PMC4720320)
Supplement: pnas.1522643113.sapp.pdf [file pnas.1522643113.sapp.pdf]

**Prevalence, genetics, and transmissibility in ferrets of Eurasian avian-like H1N1 swine influenza viruses**

Huanliang Yang<sup>a,1</sup>, Yan Chen<sup>a,1</sup>, Chuanling Qiao<sup>a,1</sup>, Xijun He<sup>a</sup>, Hong Zhou<sup>b</sup>, Yu Sun<sup>b</sup>, Hang Yin<sup>a</sup>, Shasha Meng<sup>a</sup>, Liping Liu<sup>a</sup>, Qianyi Zhang<sup>a</sup>, Huihui Kong<sup>a</sup>, Chunyang Gu<sup>a</sup>, Chengjun Li<sup>a</sup>, Zhigao Bu<sup>a</sup>, Yoshihiro Kawaoka<sup>c,2</sup>, Hualan Chen<sup>a,2</sup>

<sup>a</sup> National Key Laboratory of Veterinary Biotechnology, Harbin Veterinary Research Institute, Chinese Academy of Agricultural Sciences, 427 Maduan Street, Harbin 150001, People's Republic of China; <sup>b</sup> The First Affiliation Hospital of Harbin Medical University, 2075 Qunli 7<sup>th</sup> Street, Harbin 150070, China; and <sup>c</sup> Division of Virology, Department of Microbiology and Immunology; International Research Center for Infectious Diseases, Institute of Medical Science, University of Tokyo, 4-6-1, Shirokanedai, Minato-ku, Tokyo 108-8639, Japan

## **Supplementary documents**

### **Methods**

#### **Supporting Figures 1-4**

#### **Supporting Tables 1-6**

### **Methods**

**Swine influenza virus isolation and genetic analyses.** Swine nasal swab collection, virus isolation, and subtyping were performed as previously reported (1). All of the individual samples were inoculated into both 10-day-old embryonated chicken eggs and MDCK cells for virus isolation. HI assays were performed by using antisera against the H1, H3, H5, and H9 subtypes of swine influenza viruses. The HA lineage of the H1 subtype viruses and NA subtypes were determined by direct sequencing of the PCR products. The viral genomes were amplified by PCR and sequenced by using segment-specific primers. Phylogenetic trees were constructed by using the neighbor-joining method with a bootstrap value of 1,000; 95% sequence identity cut-offs were used to categorize the groups of each gene segment in the phylogenetic trees.

**Serologic analyses.** Antigenic analyses of the H1N1 influenza viruses were performed by using HI tests with ferret antisera generated in our laboratory against the indicated viruses. The children's sera were selected from children who visited the hospital but did not have fever; the adult's sera were collected from apparently healthy adults and elderly adults during routine physical examination. Informed consent to use the sera for influenza antibody detection was obtained. Sera were treated with Vibrio cholerae receptor-destroying enzyme (Denka-Seiken) before being tested for the presence of HI antibody with 0.5% (vol/vol) turkey erythrocytes. The minimum cut-off value for the HI assay was 10. MNT assays were performed as reported previously (2, 3).

**Solid-phase binding assay.** Viral receptor-binding capability was examined by using a solid-phase binding assay with four different biotinylated glycans as described previously (4, 5). Chicken antisera against H1N1 SIV SW/HuN/30/13 virus (for EAH1N1 SIVs), H5N1 virus A/Goose/Guangdong/1/96 (for H5N1 virus), or H1N1 virus SC/1/09 (for SC/1/09 virus) were generated in our laboratory and used for this study.

**Animal studies.** Six-week-old female BALB/c mice (Vital River Laboratories, Beijing, China) were used in this study. Briefly, groups of 6-week-old female BALB/c mice (n=8 per group) were lightly anaesthetized with CO<sub>2</sub> and inoculated intranasally (i.n.) with 10<sup>6.0</sup> EID<sub>50</sub> of test virus in a 50- $\mu$ l volume. Three mice were euthanized on day 3 post-infection (p.i.), and spleens, kidneys, brains, nasal turbinate, and lungs were harvested for virus titrations in eggs. The remaining five mice in each group were monitored daily for a total of 14 days for weight loss and survival.

Ferret replication and transmission studies were performed as reported elsewhere by using four-month-old female ferrets (*Mustela putorius furo*) (Wuxi Cay Ferret Farm, Jiangsu, China) that were serologically negative for influenza viruses. The animals were anesthetized via intramuscular injection of ketamine (20 mg/kg) and xylazine (1 mg/kg). To investigate virus replication, groups of two ferrets were anesthetized and inoculated i.n. with 10<sup>6.0</sup> EID<sub>50</sub> of test virus in a 500- $\mu$ l volume (250  $\mu$ l per nostril). The ferrets were euthanized on day 4 p.i. and the nasal turbinate, tonsils, trachea, lung, spleen, kidneys, livers, and brains were collected for virus titration in eggs.

For the respiratory droplet transmission studies, groups of ferrets (n=3 per group) were inoculated i.n. with 10<sup>6.0</sup> EID<sub>50</sub> of test virus and housed in specially designed cages inside an isolator. Twenty-four hours later, three naïve animals were placed in an adjacent cage (4 cm away), separated by a double-layered net divider. These cages allow free passage of air. Nasal washes were collected at 2-day intervals, beginning on day 2 p.i. (1 day post-exposure) and were titrated in eggs. Sera were collected from all animals on day 21 p.i. for HI antibody detection. The

ambient conditions for these studies were set at 20–22 °C and 30%–40% relative humidity. The airflow in the isolator was horizontal with a speed of 0.1 m/s; the airflow direction was from the inoculated animals to the exposed animals.

**Histological study.** Lungs were collected from ferrets on day 4 after virus inoculation and were fixed in 10% neutral buffered formalin, embedded in paraffin, and cut into 4- $\mu$ m sections. The sections were stained with hematoxylin-eosin (H&E) or used in immunohistochemical (IHC) assays with mouse antiserum against the SW/HuN/30/13 virus and goat anti-mouse IgG as the secondary antibody (KPL 16-18-06, Gaithersburg, MD, USA).

## References

1. Yang H, *et al.* (2012) Human infection from avian-like influenza A (H1N1) viruses in pigs, China. *Emerg Infect Dis* 18(7):1144-1146.
2. Rowe T, *et al.* (1999) Detection of antibody to avian influenza A (H5N1) virus in human serum by using a combination of serologic assays. *J. Clin. Microbiol.* 37(4):937-943.
3. Hancock K, *et al.* (2009) Cross-reactive antibody responses to the 2009 pandemic H1N1 influenza virus. *N Engl J Med* 361(20):1945-1952.
4. Zhang Q, *et al.* (2013) H7N9 influenza viruses are transmissible in ferrets by respiratory droplet. *Science* 341(6144):410-414.
5. Li X, *et al.* (2014) Genetics, receptor binding property, and transmissibility in mammals of naturally isolated H9N2 Avian Influenza viruses. *PLoS Pathog* 10(11):e1004508.

## Supporting Figures

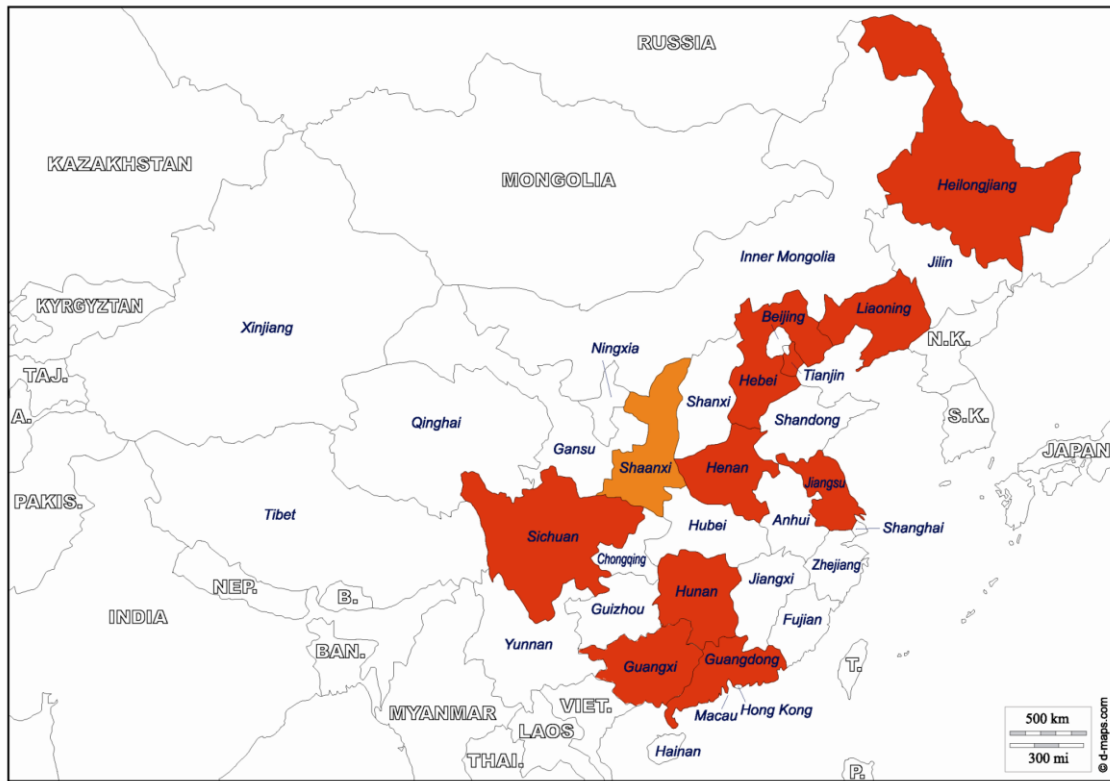

**Figure S1.** Map showing provinces from which EA H1N1 SIVs were isolated from 2010 through 2013. The red color represents the areas where the viruses were isolated in our study; the orange color depicts where EAH1N1 viruses were detected by others.

Fig.S2A NA

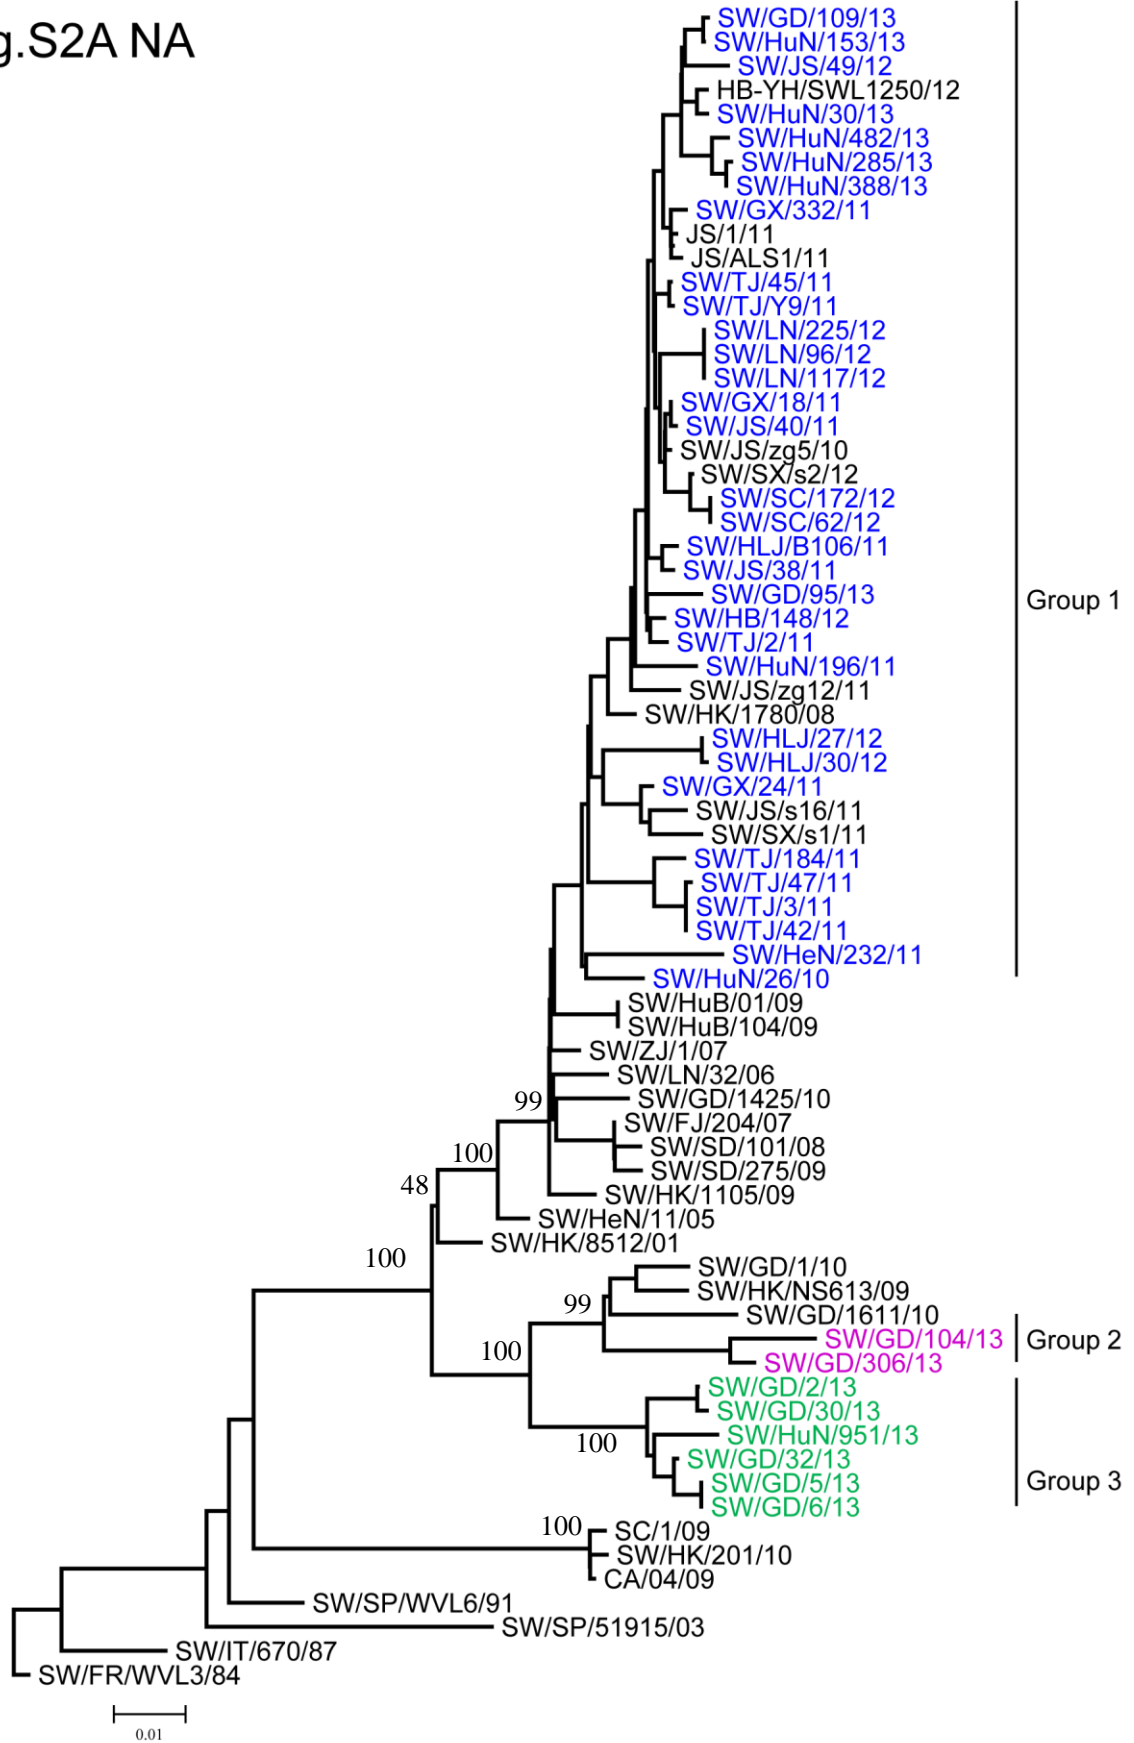

Fig.S2B PB2

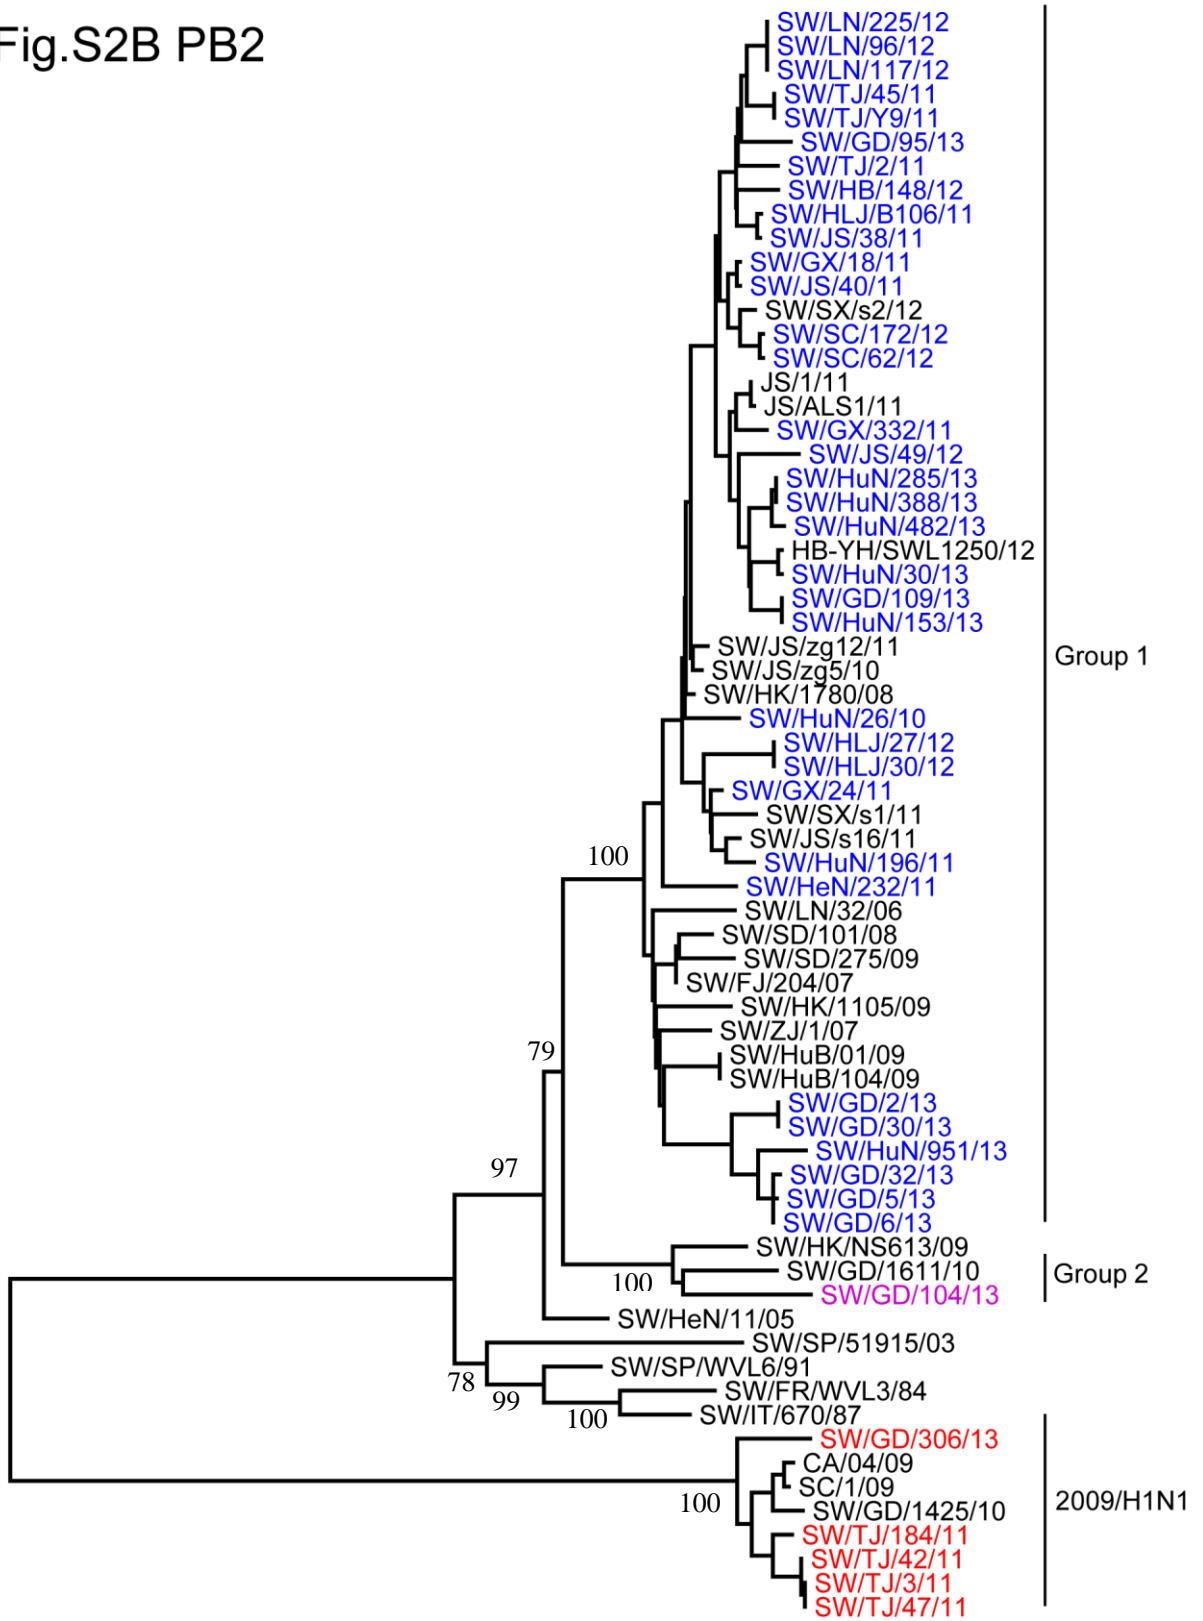

Fig.S2C PB1

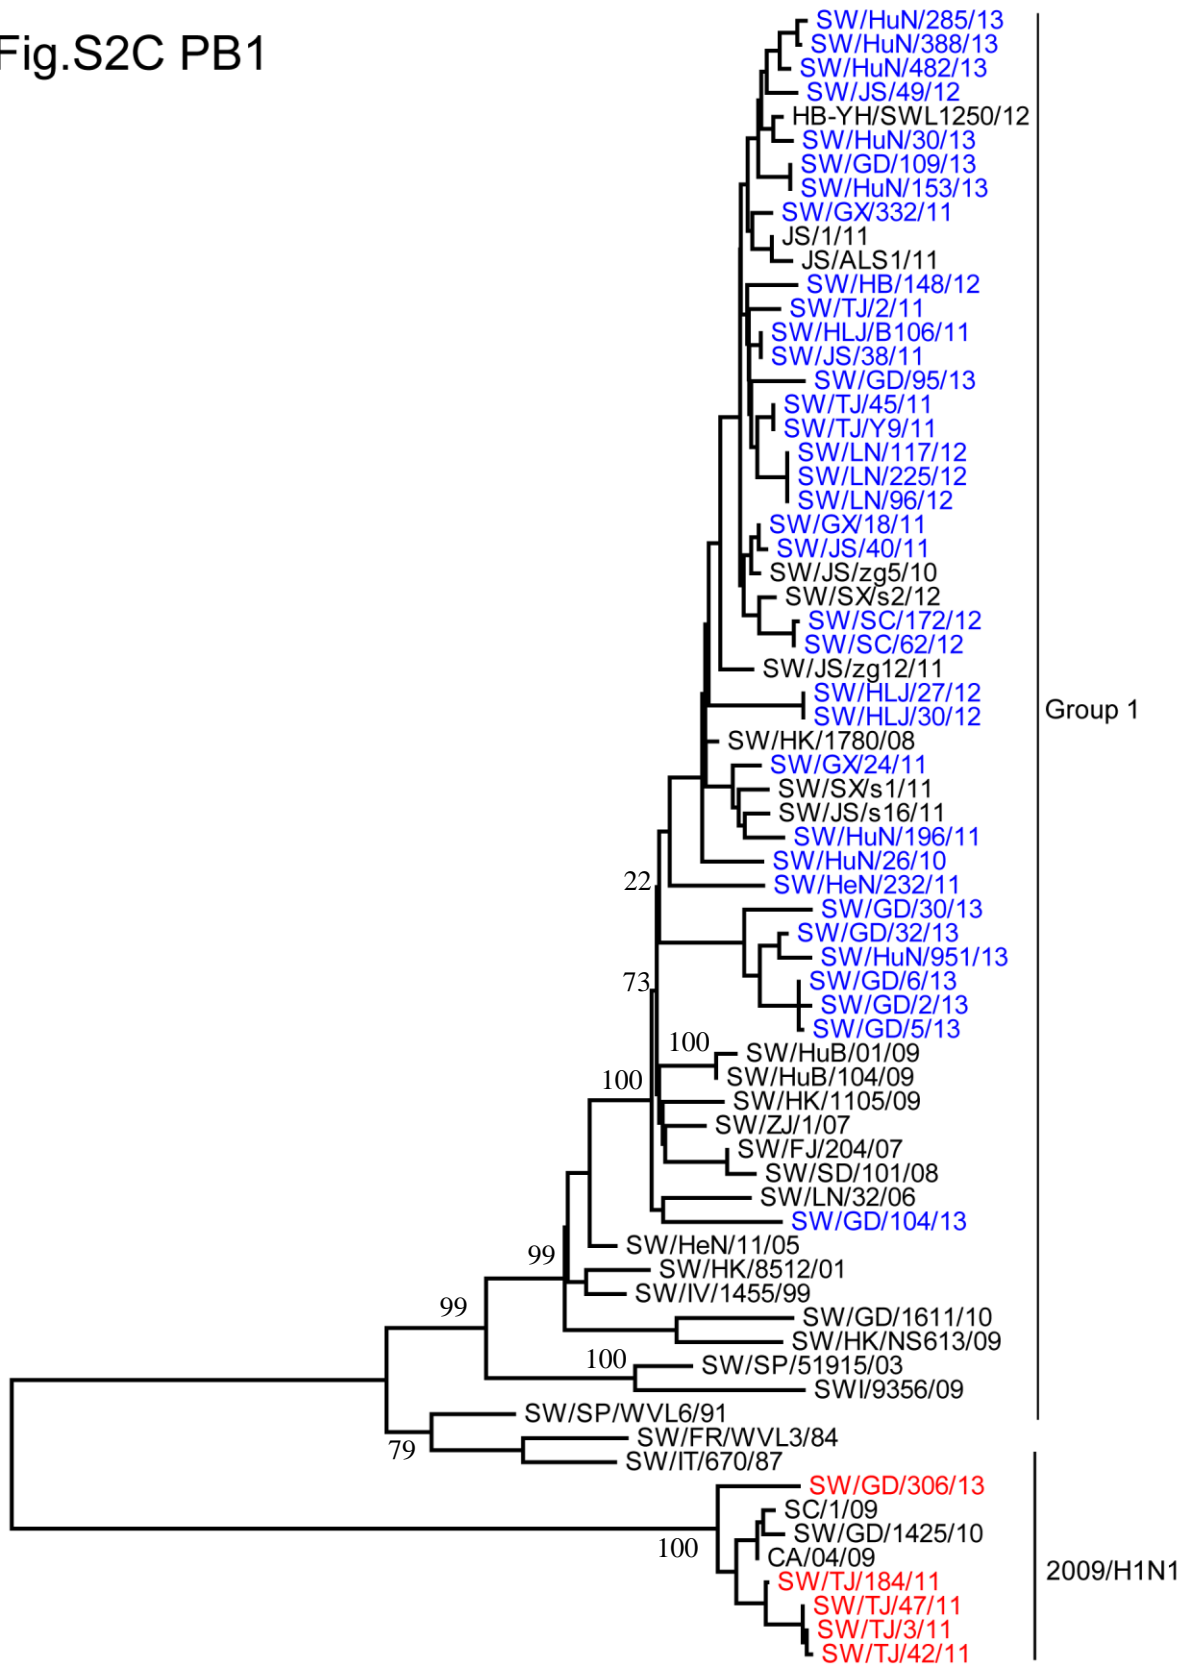



Fig.S2D PA

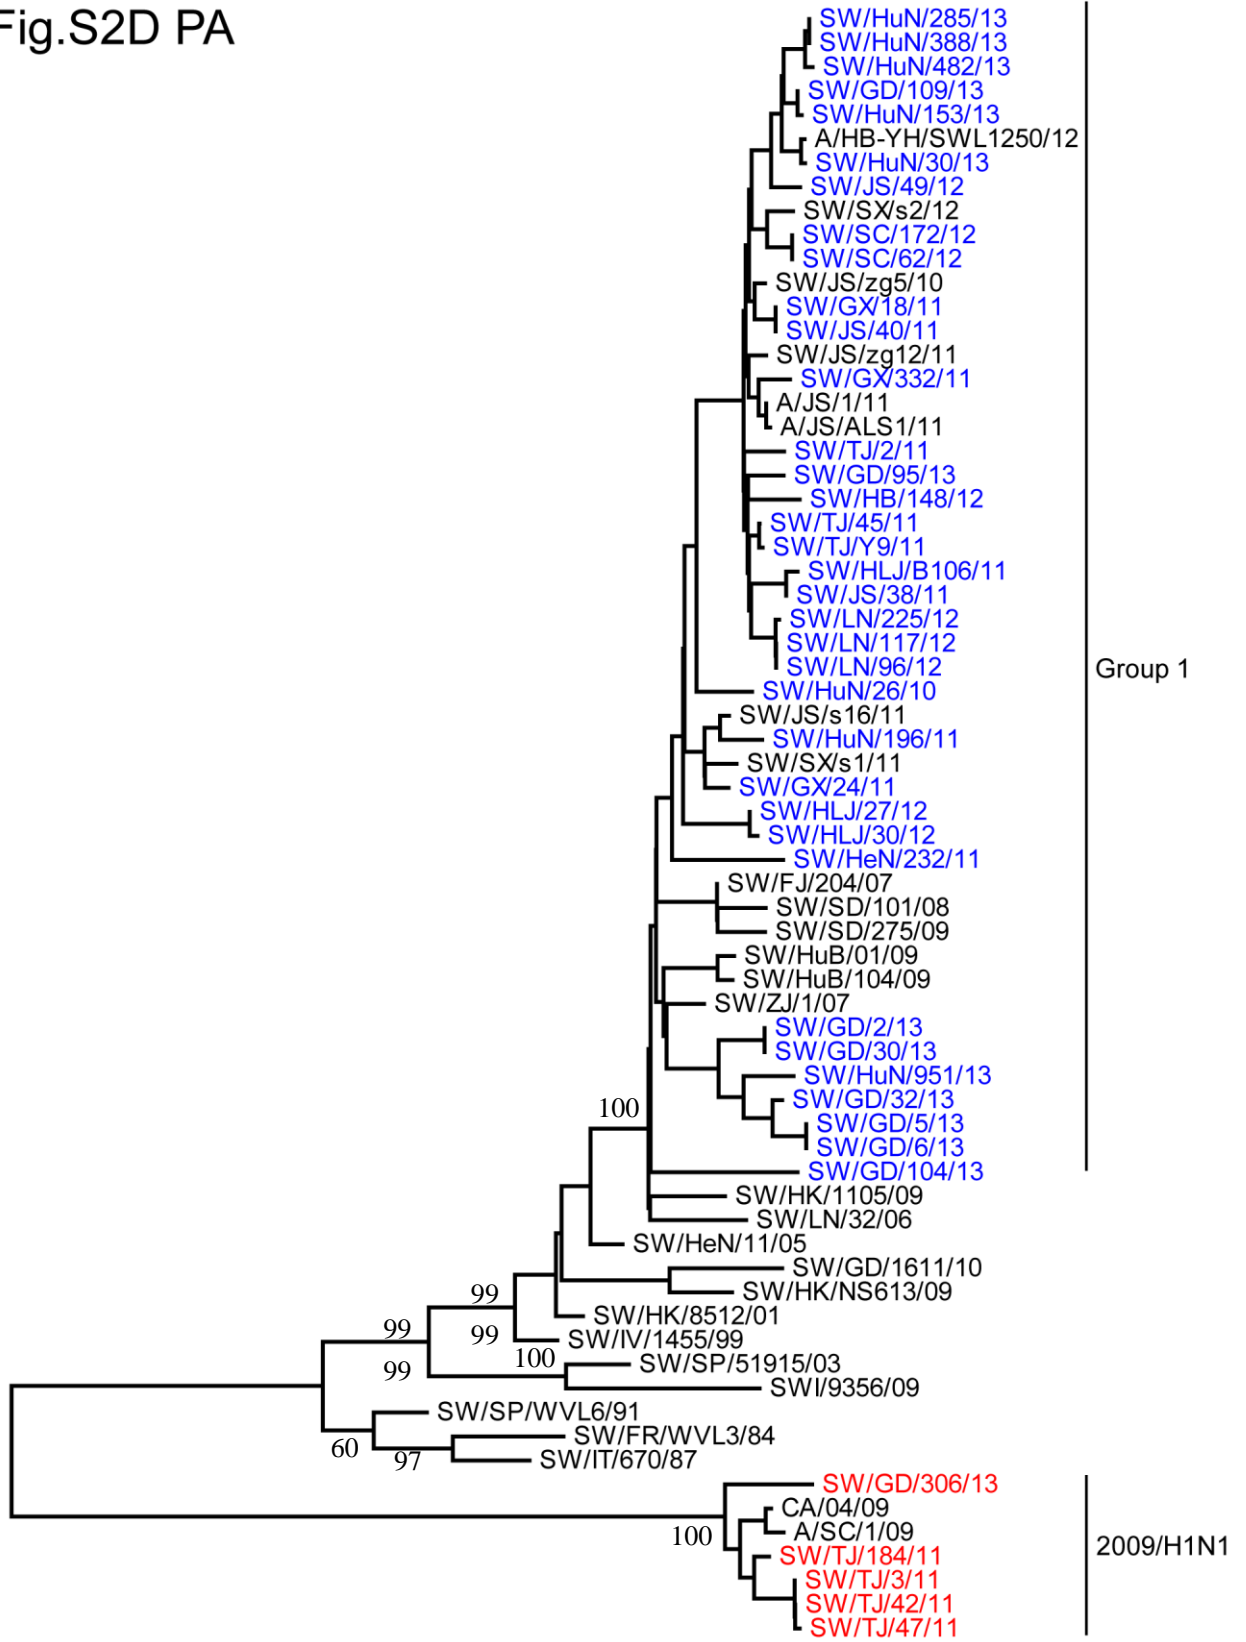

Fig.S2E NP

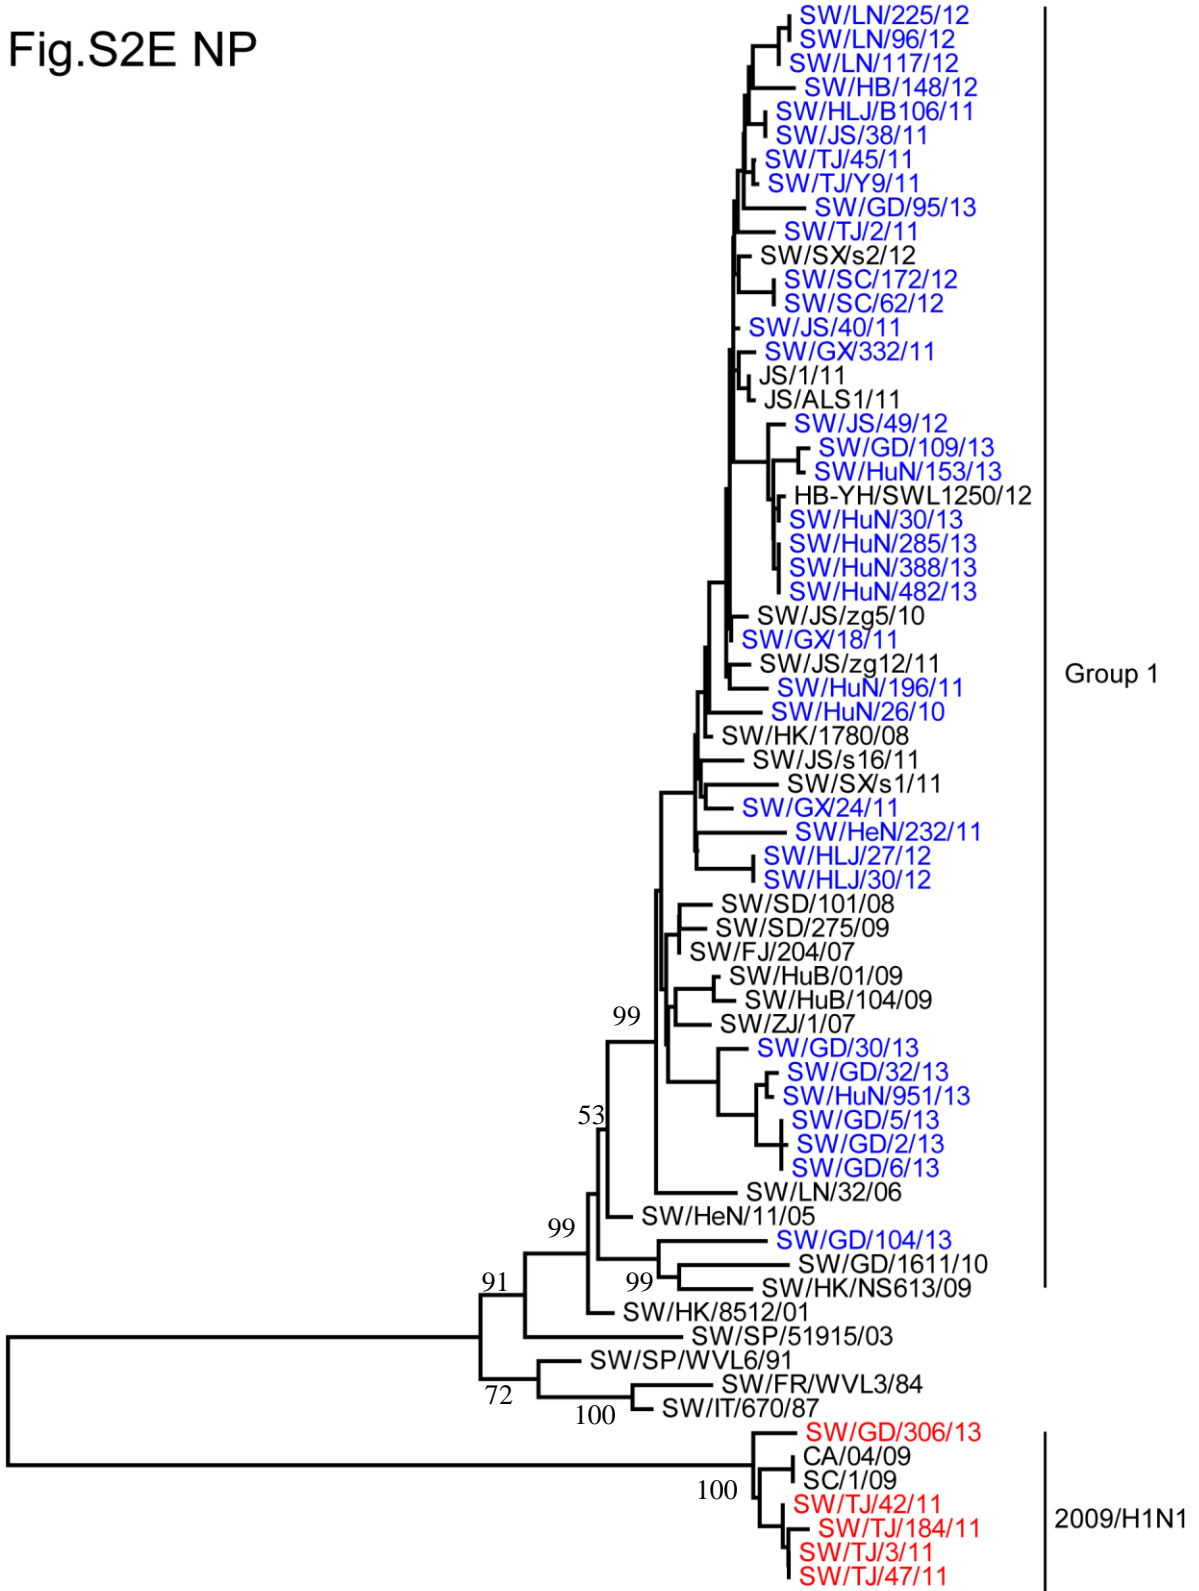

Fig.S2F M

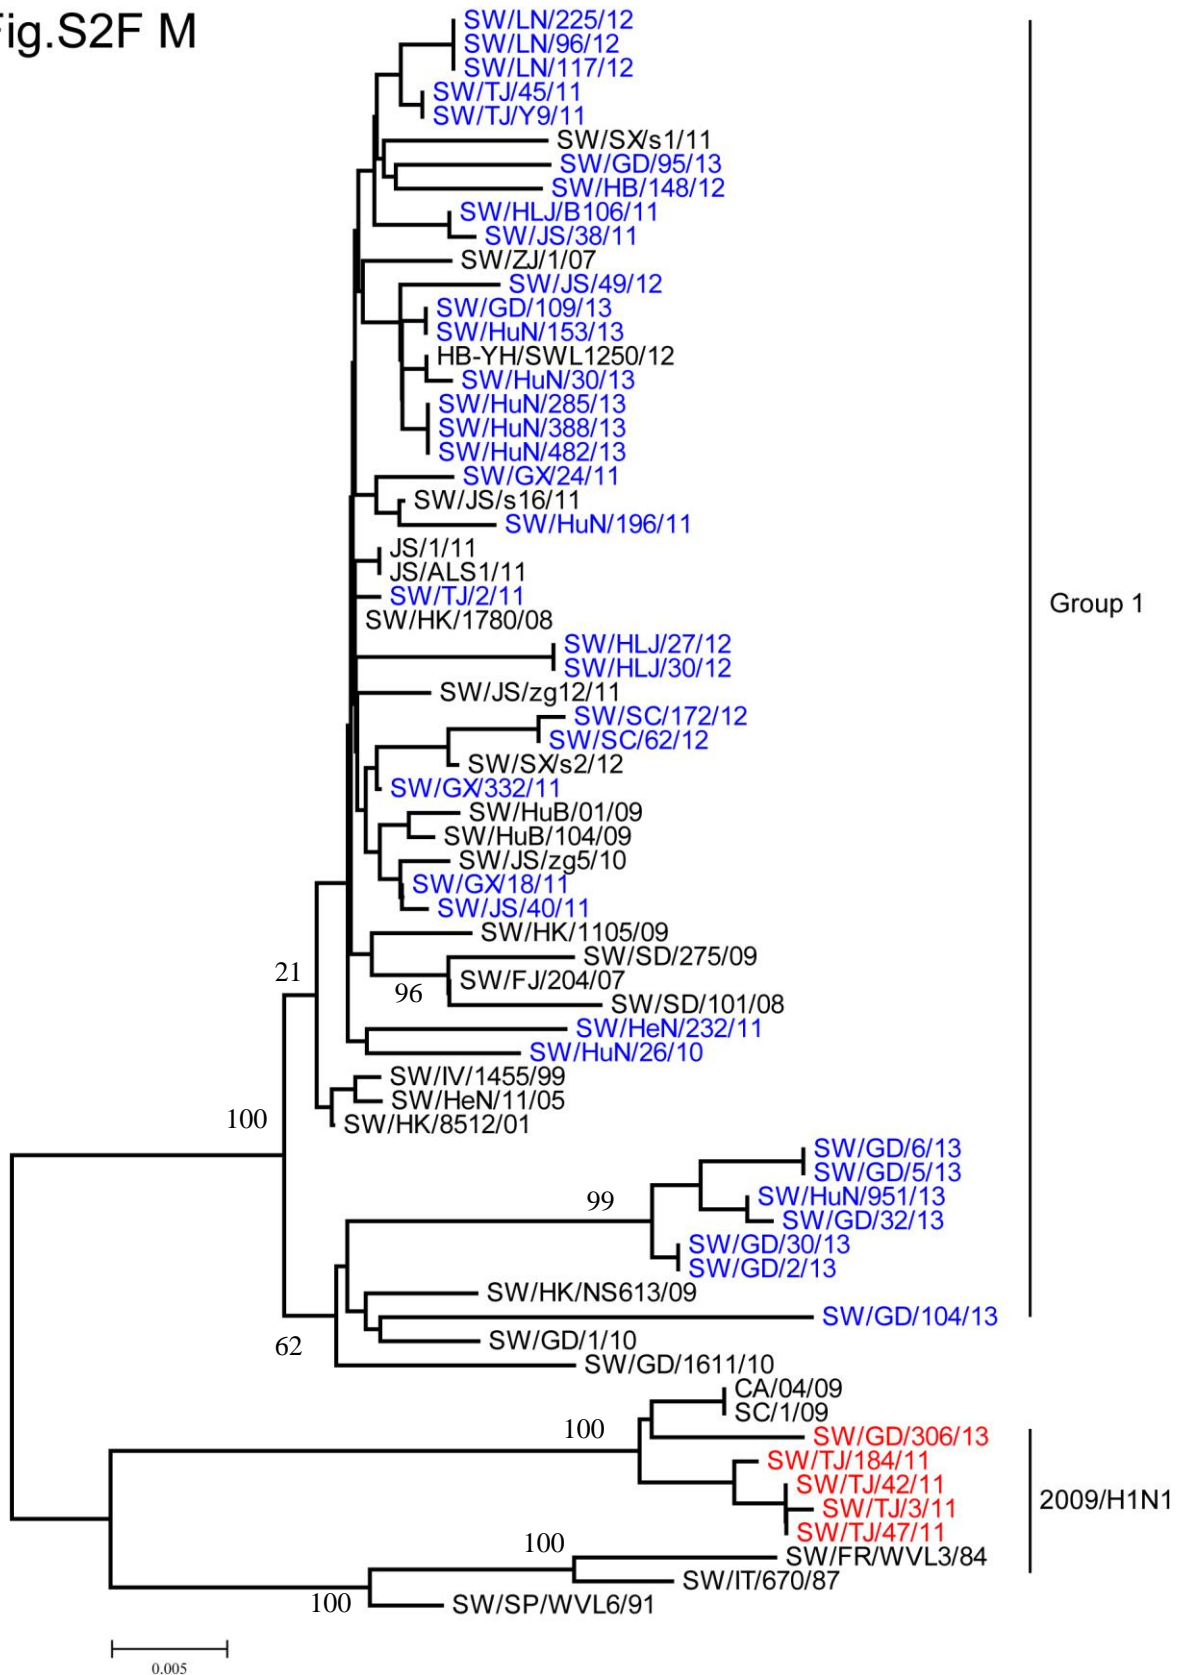

Fig.S2G NS

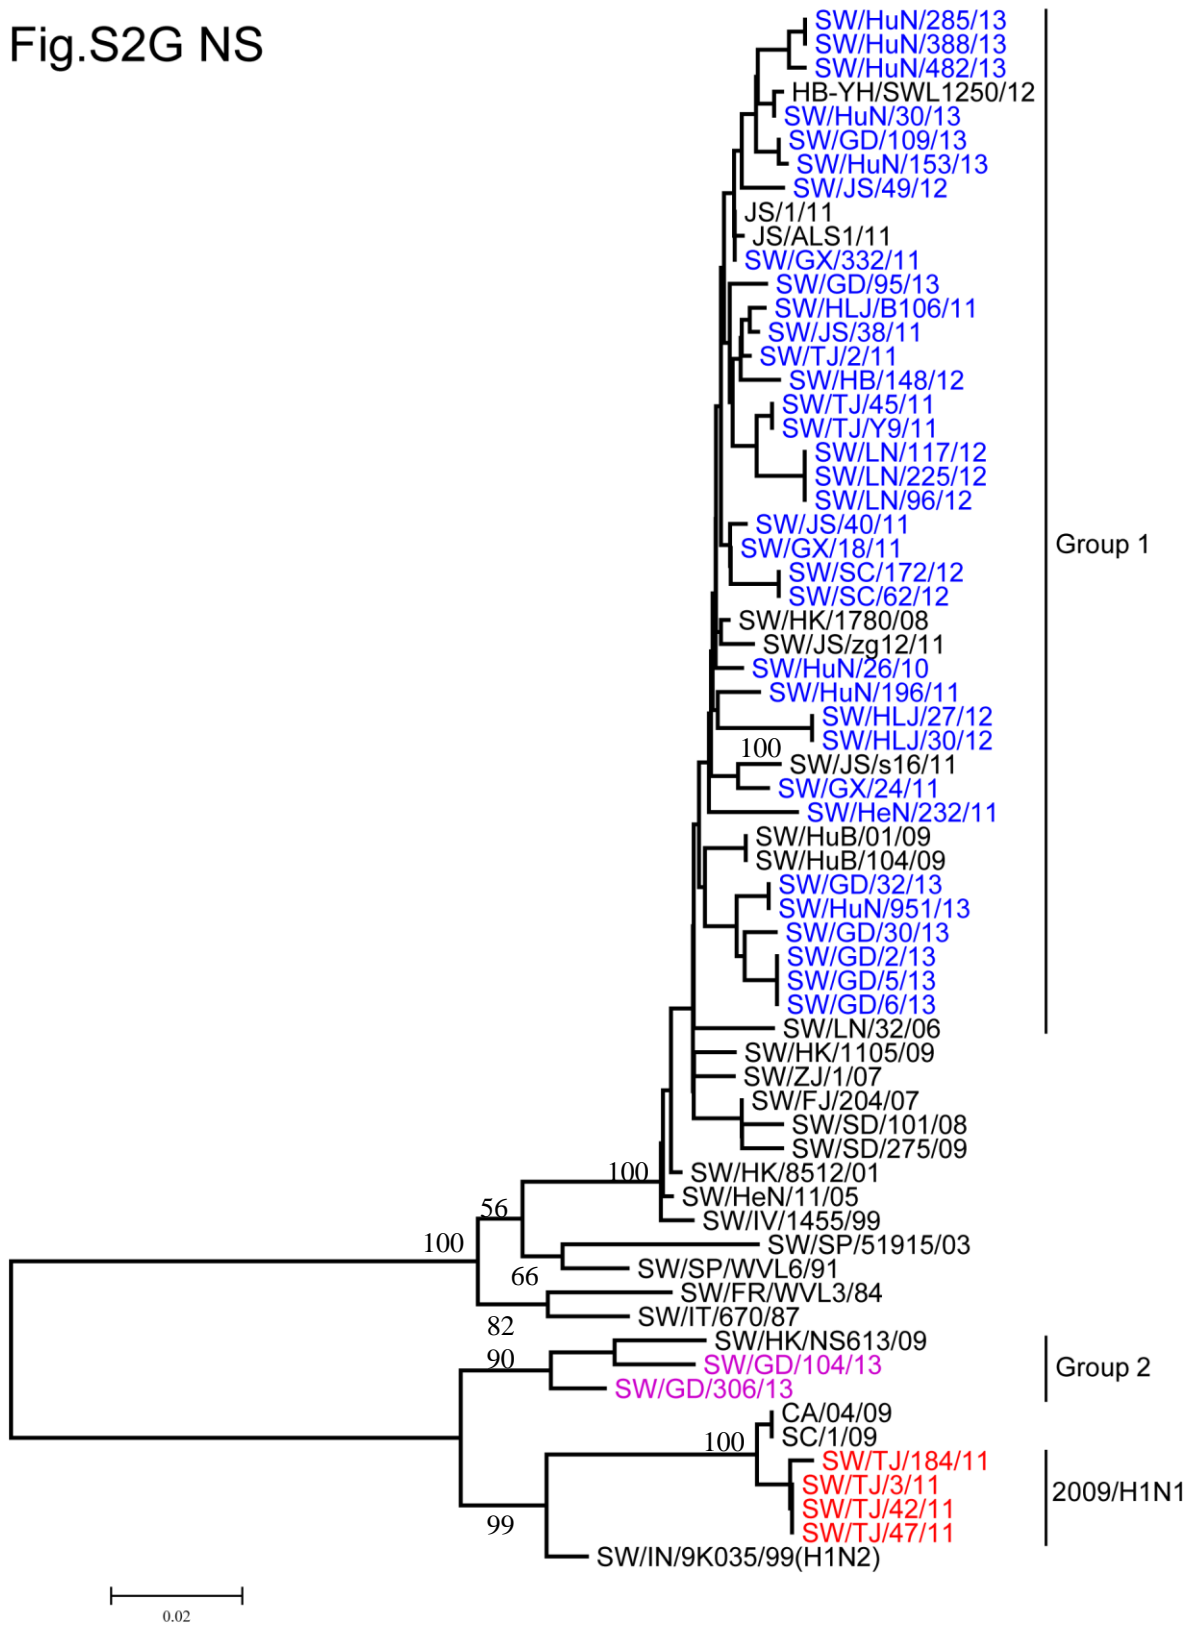

**Figure S2. Phylogenetic analyses of the EAH1N1 SIVs.** The unrooted trees were based on nucleotides (nt) 21 to 1430 for NA (**A**), 28 to 2307 for PB2 (**B**), 25 to 2298 for PB1 (**C**), 25 to 2175 for PA (**D**), 46 to 1542 for NP (**E**), 26 to 1007 for M (**F**), and 27 to 864 for NS (**G**). Sequences of viruses with names in black were downloaded from available databases; viruses with names in other colors were sequenced in this study. Abbreviations are as follows: SW, swine; CA, California; FR, France; FJ, Fujian; GD, Guangdong; GX, Guangxi; HB, Hebei; HB-YH, Hebei-Yuhua; HLJ, Heilongjiang; HeN, Henan; HK, Hong Kong; HuB, Hubei; HuN, Hunan; IN, Indiana; IO, Iowa; IT, Italy; IV, Ille et Vilaine; JS, Jiangsu; LN, Liaoning; NC, Nanchang; SC, Sichuan; SD, Shandong; SP, Spain; SX, Shanxi; SWI, Switzerland; TJ, Tianjin; and ZJ, Zhejiang.

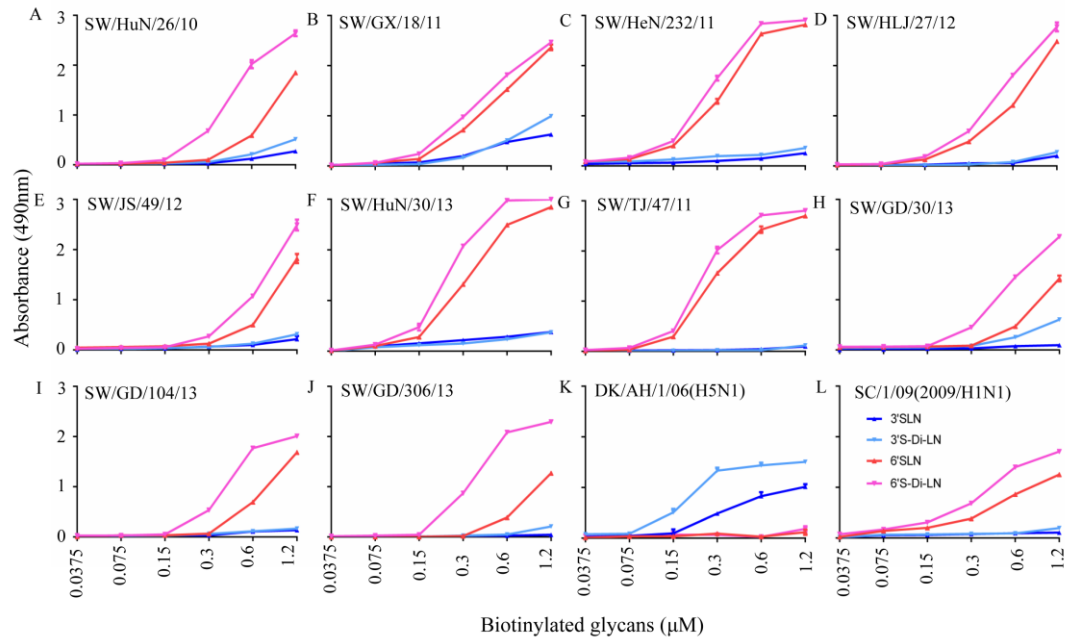

**Figure S3. Characterization of the receptor-binding properties of the EAH1N1 SIVs.** The binding of the viruses to four different biotinylated glycans (two  $\alpha$ -2,3 glycans, blue and Cambridge blue; two  $\alpha$ -2,6 glycans, red and pink) was tested. **(A)** SW/HuN/26/10; **(B)** SW/GX/18/11; **(C)** SW/HeN/232/11; **(D)** SW/HLJ/27/12; **(E)** SW/JS/49/12; **(F)** SW/HuN/30/13; **(G)** SW/TJ/47/11; **(H)** SW/GD/30/13; **(I)** SW/GD/104/13; **(J)** SW/GD/306/13; **(K)** DK/AH/1/06(H5N1); and **(L)** SC/1/09(2009/H1N1). Data shown are the mean of three repeats; the error bars indicate standard deviations.

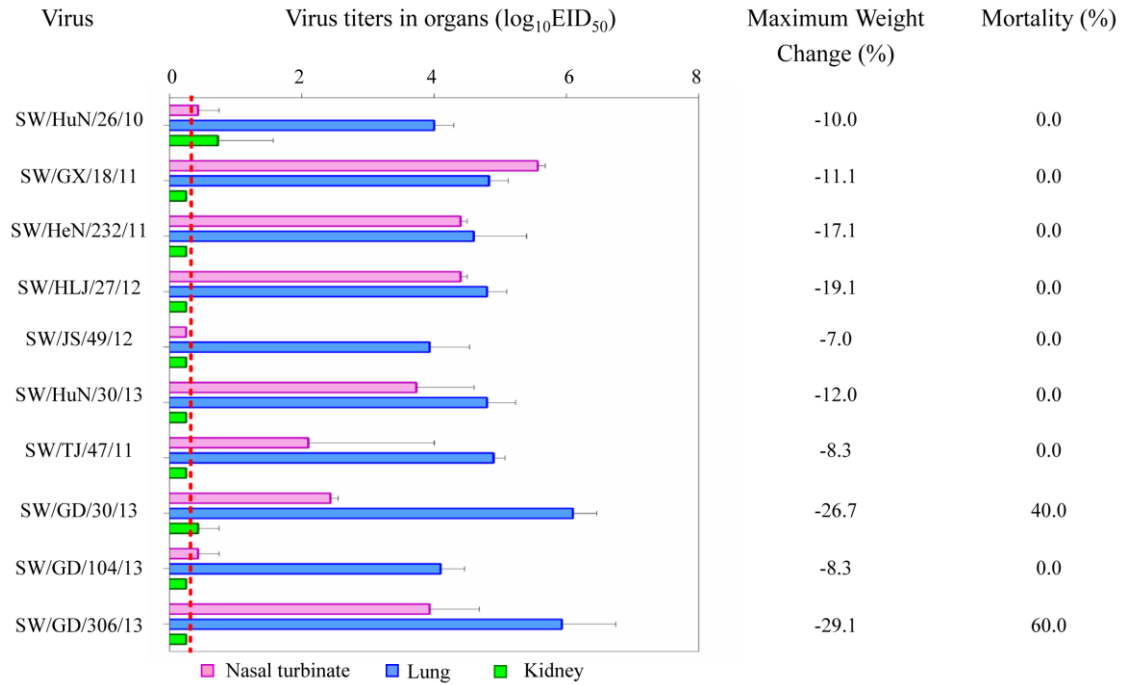

**Figure S4. Replication and virulence of EAH1N1 SIVs in mice.** Virus replication was tested as described in the Materials and Methods section. Groups of eight mice were inoculated with EAH1N1 virus at dose of  $10^6$  EID<sub>50</sub>. The virus titers shown are the mean titers of three mice. A value of 0.3 was assigned if the virus was not detected from the undiluted sample. The maximum weight change and mortality are shown as percentages. The red dashed line indicates the lower limit of detection.

**Table S1. Specifics of samples collected for SIVs isolation from 2010–2013.**

| Province or city | Sampling site  | Number of Farms<br>(Number of virus-positive farms) | Total # of samples collected | Influenza virus-positive samples (number of farms of virus presented) |                 |            |                |                |      |       |
|------------------|----------------|-----------------------------------------------------|------------------------------|-----------------------------------------------------------------------|-----------------|------------|----------------|----------------|------|-------|
|                  |                |                                                     |                              | Total                                                                 | H1N1 subtype    |            |                | Other subtypes |      |       |
|                  |                |                                                     |                              |                                                                       | Avian-like H1N1 | pH1N1/2009 | Classical H1N1 | H1N2           | H3N2 | H9N2  |
| Anhui            | Slaughterhouse | 15                                                  | 216                          | 0                                                                     | 0               | 0          | 0              | 0              | 0    | 0     |
|                  | Farm           | 4                                                   | 96                           | 0                                                                     | 0               | 0          | 0              | 0              | 0    | 0     |
| Chongqing        | Slaughterhouse | 0                                                   | 0                            | 0                                                                     | 0               | 0          | 0              | 0              | 0    | 0     |
|                  | Farm           | 2                                                   | 50                           | 0                                                                     | 0               | 0          | 0              | 0              | 0    | 0     |
| Fujian           | Slaughterhouse | 12                                                  | 412                          | 0                                                                     | 0               | 0          | 0              | 0              | 0    | 0     |
|                  | Farm           | 4 (1)                                               | 80                           | 1                                                                     | 0               | 0          | 0              | 1 (1)          | 0    | 0     |
| Guangdong        | Slaughterhouse | 114 (7)                                             | 5473                         | 7 (7)                                                                 | 3 (3)           | 1 (1)      | 0              | 3 (3)          | 0    | 0     |
|                  | Farm           | 15 (10)                                             | 590                          | 15 (10)                                                               | 9 (6)           | 0          | 2 (1)          | 4 (3)          | 0    | 0     |
| Guangxi          | Slaughterhouse | 172 (19)                                            | 10246                        | 98 (19)                                                               | 43 (3)          | 21 (6)     | 0              | 32 (8)         | 0    | 2 (2) |
|                  | Farm           | 14 (3)                                              | 400                          | 3 (3)                                                                 | 0               | 1 (1)      | 0              | 2 (2)          | 0    | 0     |
| Hebei            | Slaughterhouse | 10 (1)                                              | 424                          | 1 (1)                                                                 | 1 (1)           | 0          | 0              | 0              | 0    | 0     |
|                  | Farm           | 4                                                   | 100                          | 0                                                                     | 0               | 0          | 0              | 0              | 0    | 0     |
| Heilongjiang     | Slaughterhouse | 45 (5)                                              | 2820                         | 15 (5)                                                                | 9 (3)           | 6 (2)      | 0              | 0              | 0    | 0     |
|                  | Farm           | 13 (1)                                              | 272                          | 1 (1)                                                                 | 0               | 1 (1)      | 0              | 0              | 0    | 0     |
| Henan            | Slaughterhouse | 10                                                  | 463                          | 0                                                                     | 0               | 0          | 0              | 0              | 0    | 0     |
|                  | Farm           | 4 (1)                                               | 80                           | 1 (1)                                                                 | 1 (1)           | 0          | 0              | 0              | 0    | 0     |
| Hubei            | Slaughterhouse | 12                                                  | 414                          | 0                                                                     | 0               | 0          | 0              | 0              | 0    | 0     |
|                  | Farm           | 4                                                   | 80                           | 0                                                                     | 0               | 0          | 0              | 0              | 0    | 0     |
| Hunan            | Slaughterhouse | 89 (14)                                             | 5466                         | 42 (14)                                                               | 35 (7)          | 7 (7)      | 0              | 0              | 0    | 0     |
|                  | Farm           | 15 (3)                                              | 614                          | 7 (3)                                                                 | 3 (1)           | 4 (2)      | 0              | 0              | 0    | 0     |
| Inner Mongolia   | Slaughterhouse | 6                                                   | 395                          | 0                                                                     | 0               | 0          | 0              | 0              | 0    | 0     |
|                  | Farm           | 5                                                   | 226                          | 0                                                                     | 0               | 0          | 0              | 0              | 0    | 0     |



|          |                |          |        |        |          |         |       |         |       |       |
|----------|----------------|----------|--------|--------|----------|---------|-------|---------|-------|-------|
| Jiangsu  | slaughterhouse | 19 (2)   | 777    | 5 (2)  | 5 (2)    | 0       | 0     | 0       | 0     | 0     |
|          | Farm           | 6 (1)    | 120    | 7 (1)  | 7 (1)    | 0       | 0     | 0       | 0     | 0     |
| Jiangxi  | Slaughterhouse | 0        | 0      | 0      | 0        | 0       | 0     | 0       | 0     | 0     |
|          | Farm           | 6        | 132    | 0      | 0        | 0       | 0     | 0       | 0     | 0     |
| Liaoning | Slaughterhouse | 13 (3)   | 510    | 7 (3)  | 7 (3)    | 0       | 0     | 0       | 0     | 0     |
|          | Farm           | 5        | 176    | 0      | 0        | 0       | 0     | 0       | 0     | 0     |
| Qinghai  | Slaughterhouse | 4 (1)    | 370    | 2 (1)  | 0        | 0       | 0     | 0       | 2 (1) | 0     |
|          | Farm           | 1        | 30     | 0      | 0        | 0       | 0     | 0       | 0     | 0     |
| Shandong | Slaughterhouse | 12       | 210    | 0      | 0        | 0       | 0     | 0       | 0     | 0     |
|          | Farm           | 2        | 40     | 0      | 0        | 0       | 0     | 0       | 0     | 0     |
| Shanghai | Slaughterhouse | 10       | 480    | 0      | 0        | 0       | 0     | 0       | 0     | 0     |
|          | Farm           | 2        | 40     | 0      | 0        | 0       | 0     | 0       | 0     | 0     |
| Shanxi   | Slaughterhouse | 11       | 214    | 0      | 0        | 0       | 0     | 0       | 0     | 0     |
|          | Farm           | 2        | 40     | 0      | 0        | 0       | 0     | 0       | 0     | 0     |
| Sichuan  | Slaughterhouse | 18 (2)   | 602    | 2 (2)  | 2 (2)    | 0       | 0     | 0       | 0     | 0     |
|          | Farm           | 6        | 140    | 0      | 0        | 0       | 0     | 0       | 0     | 0     |
| Tianjin  | slaughterhouse | 24 (6)   | 914    | 12 (6) | 12 (6)   | 0       | 0     | 0       | 0     | 0     |
|          | Farm           | 8 (1)    | 180    | 2 (1)  | 2 (1)    | 0       | 0     | 0       | 0     | 0     |
| Tibet    | Slaughterhouse | 0        | 0      | 0      | 0        | 0       | 0     | 0       | 0     | 0     |
|          | Farm           | 4        | 205    | 0      | 0        | 0       | 0     | 0       | 0     | 0     |
| Xinjiang | Slaughterhouse | 1        | 100    | 0      | 0        | 0       | 0     | 0       | 0     | 0     |
|          | Farm           | 5        | 710    | 0      | 0        | 0       | 0     | 0       | 0     | 0     |
| Yunnan   | Slaughterhouse | 15       | 1000   | 0      | 0        | 0       | 0     | 0       | 0     | 0     |
|          | Farm           | 8        | 270    | 0      | 0        | 0       | 0     | 0       | 0     | 0     |
| Zhejiang | Slaughterhouse | 6 (2)    | 200    | 2 (2)  | 0        | 0       | 0     | 2 (2)   | 0     | 0     |
|          | Farm           | 2        | 40     | 0      | 0        | 0       | 0     | 0       | 0     | 0     |
| Total    |                | 759 (83) | 36,417 | 228    | 139 (40) | 39 (20) | 2 (1) | 44 (19) | 2 (1) | 2 (2) |

**Table S2.** Amino acid differences in the antigenic sites of the HA molecule of the H1N1 viruses (H3 numbering).

| Virus         | HA group  | Amino acid in the antigenic site |     |     |     |     |     |     |     |     |     |     |     |     |     |     |     |     |     |     |     |    |    |    |
|---------------|-----------|----------------------------------|-----|-----|-----|-----|-----|-----|-----|-----|-----|-----|-----|-----|-----|-----|-----|-----|-----|-----|-----|----|----|----|
|               |           | Sa                               |     |     |     | Sb  |     |     |     |     |     |     | Ca1 |     |     |     |     |     | Ca2 |     |     |    | Cb |    |
|               |           | 156                              | 158 | 160 | 166 | 187 | 188 | 189 | 190 | 193 | 198 | 169 | 171 | 172 | 208 | 238 | 239 | 140 | 142 | 145 | 225 | 74 | 75 | 77 |
| SC/1/09       | 2009/H1N1 | K                                | G   | S   | K   | T   | S   | A   | D   | S   | A   | I   | D   | K   | R   | E   | P   | P   | A   | K   | D   | S  | T  | S  |
| SW/GX/18/11   | 1         | K                                | G   | S   | K   | T   | D   | S   | D   | T   | N   | T   | N   | K   | K   | D   | Q   | S   | S   | N   | E   | L  | T  | N  |
| SW/HuN/26/10  | 1         | K                                | G   | S   | K   | T   | D   | S   | D   | T   | N   | T   | N   | K   | K   | D   | Q   | S   | S   | N   | E   | L  | T  | N  |
| SW/TJ/47/11   | 1         | K                                | G   | S   | K   | T   | D   | S   | V   | T   | N   | T   | N   | K   | K   | D   | Q   | S   | S   | N   | E   | L  | T  | N  |
| SW/HeN/232/11 | 1         | K                                | G   | S   | K   | T   | D   | S   | D   | T   | N   | T   | N   | K   | K   | D   | Q   | S   | S   | N   | E   | L  | T  | N  |
| SW/HLJ/27/12  | 1         | K                                | G   | S   | K   | T   | D   | S   | D   | T   | N   | T   | N   | K   | K   | D   | Q   | S   | S   | N   | E   | L  | T  | N  |
| SW/JS/49/12   | 1         | K                                | G   | S   | K   | T   | Y   | S   | D   | T   | N   | T   | N   | K   | K   | D   | Q   | S   | S   | N   | E   | L  | T  | N  |
| SW/HuN/30/13  | 1         | K                                | G   | S   | K   | T   | D   | S   | D   | T   | N   | T   | N   | K   | K   | D   | Q   | S   | S   | N   | E   | L  | T  | N  |
| SW/GD/30/13   | 1         | K                                | G   | S   | K   | T   | D   | S   | D   | T   | N   | T   | N   | R   | K   | D   | Q   | S   | S   | N   | G   | L  | K  | N  |
| SW/GD/104/13  | 2         | Q                                | E   | S   | N   | N   | Y   | R   | D   | A   | N   | T   | N   | K   | K   | D   | Q   | S   | S   | K   | E   | L  | T  | D  |
| SW/GD/306/13  | 2         | Q                                | E   | A   | N   | N   | Y   | S   | N   | A   | N   | T   | N   | K   | K   | D   | Q   | S   | S   | N   | E   | L  | T  | D  |

**Table S3.** Mutations detected in the EAH1N1 SIVs that contribute to increased binding to human-type receptors, transmission, replication, and virulence in mammals, as well as to resistance to amantadine and rimantadine.

| Virus <sup>a</sup> | Passage history <sup>b</sup> | Genotype | HA    |       |       | PB2   |       |       |       | M2   |
|--------------------|------------------------------|----------|-------|-------|-------|-------|-------|-------|-------|------|
|                    |                              |          | E190D | G225E | R226Q | T271A | Q591R | E627K | D701N | S31N |
| SW/HuN/26/10       | C1E2                         | 1        | D     | E     | Q     | T     | Q     | E     | N     | N    |
| SW/GX/18/11        | E3                           | 1        | D     | E     | Q     | T     | Q     | E     | N     | N    |
| SW/GX/24/11        | E3                           | 1        | D     | E     | Q     | T     | Q     | E     | N     | N    |
| SW/GX/332/11       | E3                           | 1        | D     | E     | Q     | T     | Q     | E     | N     | N    |
| SW/HLJ/B106/11     | E3                           | 1        | V     | E     | Q     | T     | Q     | E     | N     | N    |
| SW/HeN/232/11      | E3                           | 1        | D     | E     | Q     | T     | Q     | V     | N     | N    |
| SW/HuN/196/11      | E3                           | 1        | D     | E     | Q     | T     | Q     | E     | N     | N    |
| SW/JS/38/11        | E3                           | 1        | D     | G     | Q     | T     | Q     | E     | N     | N    |
| SW/JS/40/11        | E4                           | 1        | V     | E     | Q     | T     | Q     | E     | N     | N    |
| SW/TJ/2/11         | C1E2                         | 1        | D     | E     | Q     | T     | Q     | E     | N     | N    |
| SW/TJ/45/11        | C1E2                         | 1        | D     | E     | Q     | T     | Q     | E     | N     | N    |
| SW/TJ/Y9/11        | C1E2                         | 1        | N     | E     | Q     | T     | Q     | E     | N     | N    |
| SW/HB/148/12       | E3                           | 1        | D     | E     | Q     | T     | Q     | E     | N     | N    |
| SW/HLJ/27/12       | C1E2                         | 1        | D     | G     | Q     | T     | Q     | E     | N     | N    |
| SW/HLJ/30/12       | C1E2                         | 1        | D     | E     | Q     | T     | Q     | E     | N     | N    |
| SW/JS/49/12        | C1E2                         | 1        | D     | E     | Q     | T     | Q     | E     | N     | N    |
| SW/LN/117/12       | E4                           | 1        | D     | G     | Q     | T     | Q     | E     | N     | N    |
| SW/LN/225/12       | E4                           | 1        | D     | G     | Q     | T     | Q     | E     | N     | N    |
| SW/LN/96/12        | E4                           | 1        | D     | E     | Q     | T     | Q     | E     | N     | N    |
| SW/SC/172/12       | C1E2                         | 1        | N     | E     | Q     | T     | Q     | E     | N     | N    |
| SW/SC/62/12        | C1E2                         | 1        | D     | G     | Q     | T     | Q     | E     | N     | N    |
| SW/GD/109/13       | E3                           | 1        | D     | G     | Q     | T     | Q     | E     | N     | N    |
| SW/GD/95/13        | E3                           | 1        | D     | E     | Q     | T     | Q     | E     | N     | N    |
| SW/HuN/153/13      | E3                           | 1        | D     | G     | Q     | T     | Q     | E     | N     | N    |
| SW/HuN/285/13      | E3                           | 1        | D     | G     | Q     | T     | Q     | E     | N     | N    |
| SW/HuN/30/13       | E3                           | 1        | D     | E     | Q     | T     | Q     | E     | N     | N    |
| SW/HuN/388/13      | E3                           | 1        | V     | E     | Q     | T     | Q     | E     | N     | N    |

|               |      |   |   |   |   |   |   |   |   |   |
|---------------|------|---|---|---|---|---|---|---|---|---|
| SW/HuN/482/13 | E3   | 1 | D | E | Q | T | Q | E | N | N |
| SW/TJ/184/11  | C1E2 | 2 | D | E | Q | A | R | E | D | N |
| SW/TJ/3/11    | C1E2 | 2 | D | E | Q | A | R | E | D | N |
| SW/TJ/42/11   | C1E2 | 2 | D | E | Q | A | R | E | D | N |
| SW/TJ/47/11   | C1E2 | 2 | V | E | Q | A | R | E | D | N |
| SW/GD/2/13    | E3   | 3 | N | E | Q | T | Q | E | N | N |
| SW/GD/30/13   | E3   | 3 | D | G | Q | T | Q | E | N | N |
| SW/GD/32/13   | E3   | 3 | D | E | Q | T | Q | E | N | N |
| SW/GD/5/13    | E3   | 3 | D | E | Q | T | Q | E | N | N |
| SW/GD/6/13    | E3   | 3 | D | G | Q | T | Q | E | N | N |
| SW/HuN/951/13 | E3   | 3 | D | G | Q | T | Q | E | N | N |
| SW/GD/104/13  | E3   | 4 | D | E | Q | T | Q | E | N | N |
| SW/GD/306/13  | E3   | 5 | N | E | Q | A | R | E | D | N |

<sup>a</sup>Viruses in red were selected for antigenic analysis, receptor binding assays, and mouse and ferret studies.

<sup>b</sup>C, cell culture; E, eggs; the number indicated the number of passages.

**Table S4.** Body temperature increases and body weight changes of ferrets inoculated with or exposed to different EAH1N1 SIVs or the 2009/H1N1 pandemic virus.

| Virus (genotype)  | Animal pair | Body temperature increase ( °C) |         | Body weight change (%) <sup>a</sup> |         |
|-------------------|-------------|---------------------------------|---------|-------------------------------------|---------|
|                   |             | Inoculated                      | Exposed | Inoculated                          | Exposed |
| SW/HuN/26/10 (1)  | 1           | 1                               | 1.4     | -0.8                                | +9.5    |
|                   | 2           | 2.2                             | 1.4     | -0.2                                | +5.7    |
|                   | 3           | 2.2                             | 1.3     | -0.3                                | -5.6    |
| SW/GX/18/11 (1)   | 1           | 1.7                             | 0.8     | -17.9                               | -14     |
|                   | 2           | 0.8                             | 0.9     | -8.4                                | -6.9    |
|                   | 3           | 1.1                             | 0.7     | -6.0                                | -21     |
| SW/HeN/232/11 (1) | 1           | 1.9                             | 1.1     | -18.6                               | -7.4    |
|                   | 2           | 1.4                             | 1.2     | -12.5                               | -4.5    |
|                   | 3           | 1.7                             | 0.9     | -8                                  | -14     |
| SW/HLJ/27/12 (1)  | 1           | 0.8                             | 0.3     | -11.8                               | +11.8   |
|                   | 2           | 1                               | 0.6     | -15.2                               | -11.7   |
|                   | 3           | 0.7                             | 0.2     | -4.5                                | +5.8    |
| SW/JS/49/12 (1)   | 1           | 1.5                             | 0.5     | -5.6                                | -7      |
|                   | 2           | 2.1                             | 0.1     | -1.4                                | +8      |
|                   | 3           | 0.9                             | 1.2     | -4                                  | -12.3   |
| SW/HuN/30/13 (1)  | 1           | 0.9                             | 1.2     | -3.4                                | -2.8    |
|                   | 2           | 0.8                             | 0.8     | -0.1                                | -9.4    |
|                   | 3           | 1.5                             | 0.9     | -2.8                                | -2.9    |
| SW/TJ/47/11 (2)   | 1           | 0.7                             | 1       | -5.4                                | -4.5    |
|                   | 2           | 0.7                             | 0.8     | -12.9                               | -6.7    |
|                   | 3           | 1.4                             | 0.7     | -3.2                                | -7.1    |
| SW/GD/30/13 (3)   | 1           | 0.8                             | 0.2     | -3.2                                | +13.8   |
|                   | 2           | 1.0                             | 0.5     | -1.4                                | -4.6    |
|                   | 3           | 0.7                             | 0.2     | -0.8                                | +3.3    |
| SW/GD/104/13 (4)  | 1           | 1.0                             | 0.6     | -1.8                                | -1.0    |
|                   | 2           | 0.6                             | 0.5     | -0.7                                | +11.1   |
|                   | 3           | 0.9                             | 0.3     | -1.3                                | +11.7   |

|                  |   |     |     |       |       |
|------------------|---|-----|-----|-------|-------|
| SW/GD/306/13 (5) | 1 | 0.9 | 0.4 | -2.4  | +3.0  |
|                  | 2 | 0.7 | 0.6 | -2.9  | +1.4  |
|                  | 3 | 1.6 | 0.5 | -10.3 | +9.5  |
| SC/1/09          | 1 | 1.7 | 0.6 | -10.1 | -10.2 |
|                  | 2 | 0.7 | 1.3 | -6.1  | -3.7  |
|                  | 3 | 2.2 | 2.3 | -9.6  | -21.2 |

<sup>a</sup>The maximum body weight change of each ferret observed during the three-week observation period is shown. +, body weight increase; -, body weight loss.

**Table S5.** Cross-reactive antibody response against influenza A(H1N1) viruses of human sera collected in north China in 2015.

| Age group (year) | Antigen      | %HI titer $\geq$ 40 (95% CI <sup>a</sup> ) | %NT titer $\geq$ 40 for children or $\geq$ 80 for adults (95% CI <sup>a</sup> ) |
|------------------|--------------|--------------------------------------------|---------------------------------------------------------------------------------|
| $\leq$ 10, n=55  | SC/1/09      | 9.1 (1.5-16.7)                             | 12.7 (3.9–21.5)                                                                 |
|                  | SW/GX/18/11  | 5.5 (0-11.5)                               | 3.6 (0–8.6)                                                                     |
|                  | SW/GD/104/13 | 0                                          | 0                                                                               |
| 25-53, n=52      | SC/1/09      | 7.7 (0.5-14.9)                             | 1.9 (0–5.7)                                                                     |
|                  | SW/GX/18/11  | 11.5 (2.9-20.2)                            | 0                                                                               |
|                  | SW/GD/104/13 | 3.8 (0-9.1)                                | 0                                                                               |
| $\geq$ 60, n=52  | SC/1/09      | 1.9 (0-5.7)                                | 0                                                                               |
|                  | SW/GX/18/11  | 3.8 (0-9.1)                                | 13.4 (4.2–22.7)                                                                 |
|                  | SW/GD/104/13 | 0                                          | 0                                                                               |

<sup>a</sup>Confidence intervals.

**Table S6.** Risk scores for the emergence of a pandemic strain among six animal influenza viruses<sup>a</sup>.

| Element                            | Weight (W) <sup>b</sup> | Avian H1N1                   |       | H7N9 |       | H3N2v |       | H9N2 |       | H5N1 |       | EAH1N1 |       |
|------------------------------------|-------------------------|------------------------------|-------|------|-------|-------|-------|------|-------|------|-------|--------|-------|
|                                    |                         | Risk score (RS) <sup>c</sup> | W×RS  | RS   | W×RS  | RS    | W×RS  | RS   | W×RS  | RS   | W×RS  | RS     | W×RS  |
| Human infections                   | 0.2929                  | 2.3                          | 0.674 | 5    | 1.465 | 5.8   | 1.699 | 3    | 0.879 | 5    | 1.465 | 5      | 1.466 |
| Transmission in laboratory animals | 0.1929                  | 2                            | 0.386 | 7    | 1.350 | 7.5   | 1.447 | 8    | 1.543 | 2    | 0.386 | 9.5    | 1.833 |
| Receptor binding                   | 0.1429                  | 2                            | 0.286 | 6.3  | 0.900 | 8.6   | 1.229 | 9    | 1.286 | 3    | 0.429 | 9      | 1.286 |
| Population immunity (To vaccine)   | 0.1096                  | 3                            | 0.329 | 9    | 0.986 | 4.1   | 0.449 | 9    | 0.986 | 9    | 0.986 | 7      | 0.767 |
| Infections in animals              | 0.0846                  | 2                            | 0.169 | 4.7  | 0.398 | 7.4   | 0.626 | 8    | 0.677 | 8    | 0.677 | 8      | 0.678 |
| Genomic variation                  | 0.0646                  | 3                            | 0.194 | 8.6  | 0.556 | 7.6   | 0.491 | 2    | 0.129 | 5    | 0.323 | 7      | 0.452 |
| Antigenic relatedness              | 0.0479                  | 2                            | 0.096 | 3.7  | 0.177 | 5.5   | 0.263 | 3.5  | 0.168 | 3.5  | 0.168 | 5      | 0.240 |
| Global distribution animals        | 0.0336                  | 2.5                          | 0.084 | 4.7  | 0.158 | 5.8   | 0.195 | 7    | 0.235 | 7    | 0.235 | 7      | 0.235 |
| Disease severity                   | 0.0211                  | 2.25                         | 0.047 | 8.5  | 0.179 | 4.8   | 0.101 | 7    | 0.148 | 9    | 0.190 | 7      | 0.148 |
| Antiviral and treatment options    | 0.001                   | 2.25                         | 0.002 | 5.8  | 0.006 | 3.9   | 0.004 | 5.8  | 0.006 | 5.8  | 0.006 | 5.8    | 0.006 |
| Summary risk score                 |                         |                              | 2.27  |      | 6.18  |       | 6.5   |      | 6.06  |      | 4.87  |        | 7.11  |

<sup>a</sup> Avian H1N1, A/duck/New York/1996; H7N9, A/pigeon/Shanghai/S1421/2013; H3N2v, A/Indiana/08/2011(H3N2); H9N2, A/chick/Jiangsu/C4258/2012; H5N1, A/duck/Guangxi/35/2001; EAH1N1, A/swine/Guangxi/18/2011.

<sup>b</sup> The calculated weight of each element is described in the Influenza Risk Assessment Tool (IRAT) developed by CDC (USA) (reference 41, main text).

<sup>c</sup> The risk score numbers are the averages provided by five experts, who estimated the scores by using the framework of risk element definitions and scoring criteria described in the IRAT.
